# Supplementary material for: Histidine kinase MHZ1/OsHK1 interacts with ethylene receptors to regulate root growth in rice
Source: PubMed Central journal article supplement (PMC6981129; doi:10.1038/s41467-020-14313-0), 2020-01-24
Supplement: 41467_2020_14313_MOESM3_ESM.pdf [file 41467_2020_14313_MOESM3_ESM.pdf]

## **Description of Additional Supplementary Files**

File Name: Supplementary Data 1

Description: RNA-seq analysis of ethylene-related genes in WT, mhz1, Oseil1 and Osein2.
